# Supplementary material for: LATERAL ORGAN FUSION1andLATERAL ORGAN FUSION2function in lateral organ separation and axillary meristem formation inArabidopsis
Source: Oxford University Press journal article supplement (doi:10.1242/dev.031971), 2009-06-19
Supplement: dev031971table1.pdf [file dev031971table1.pdf]

**Table S1. Frequency of fusion between primary inflorescence stem and pedicels**

| Genotype         | Number of plants with observed fusion/total plants examined | %   |
|------------------|-------------------------------------------------------------|-----|
| Col              | 0/16                                                        | 0   |
| <i>lof1-1</i>    | 0/16                                                        | 0   |
| <i>cuc1-13</i>   | 0/16                                                        | 0   |
| <i>cuc2-3</i>    | 0/16                                                        | 0   |
| <i>cuc3-105</i>  | 7/16                                                        | 44  |
| <i>lof1 cuc1</i> | 0/16                                                        | 0   |
| <i>lof1 cuc2</i> | 28/31                                                       | 90  |
| <i>lof1 cuc3</i> | 32/32                                                       | 100 |
